# Supplementary material for: The Facet of Human Impact: Solenopsis invicta Buren, 1972 Spreading around the Atlantic Forest
Source: MDPI journal article supplement (doi:10.3390/d15020194), 2023-02-01
Supplement: s1 [file s1]

Archive with 3 entries (3 files):
- Supplementary Material Figure S1.tif
- Supplementary Material Figure S2.pdf
- Supplementary Material Table S1.pdf
