# Supplementary material for: The Facet of Human Impact: Solenopsis invicta Buren, 1972 Spreading around the Atlantic Forest
Source: MDPI journal article supplement (doi:10.3390/d15020194), 2023-02-01

**Supplementary Material Figure S2** - Photographs of *Solenopsis invicta* (MPEG.HHY03046581). **A.** Lateral view, arrow indicating the convex mesonotum. **B.** Dorsal view. **C.** Head in frontal view indicating the median frontal streak. **D.** Portion of post-petiole in posterior view wider than tall with roughly transversely to rough-punctured sculpting covering much of the view.

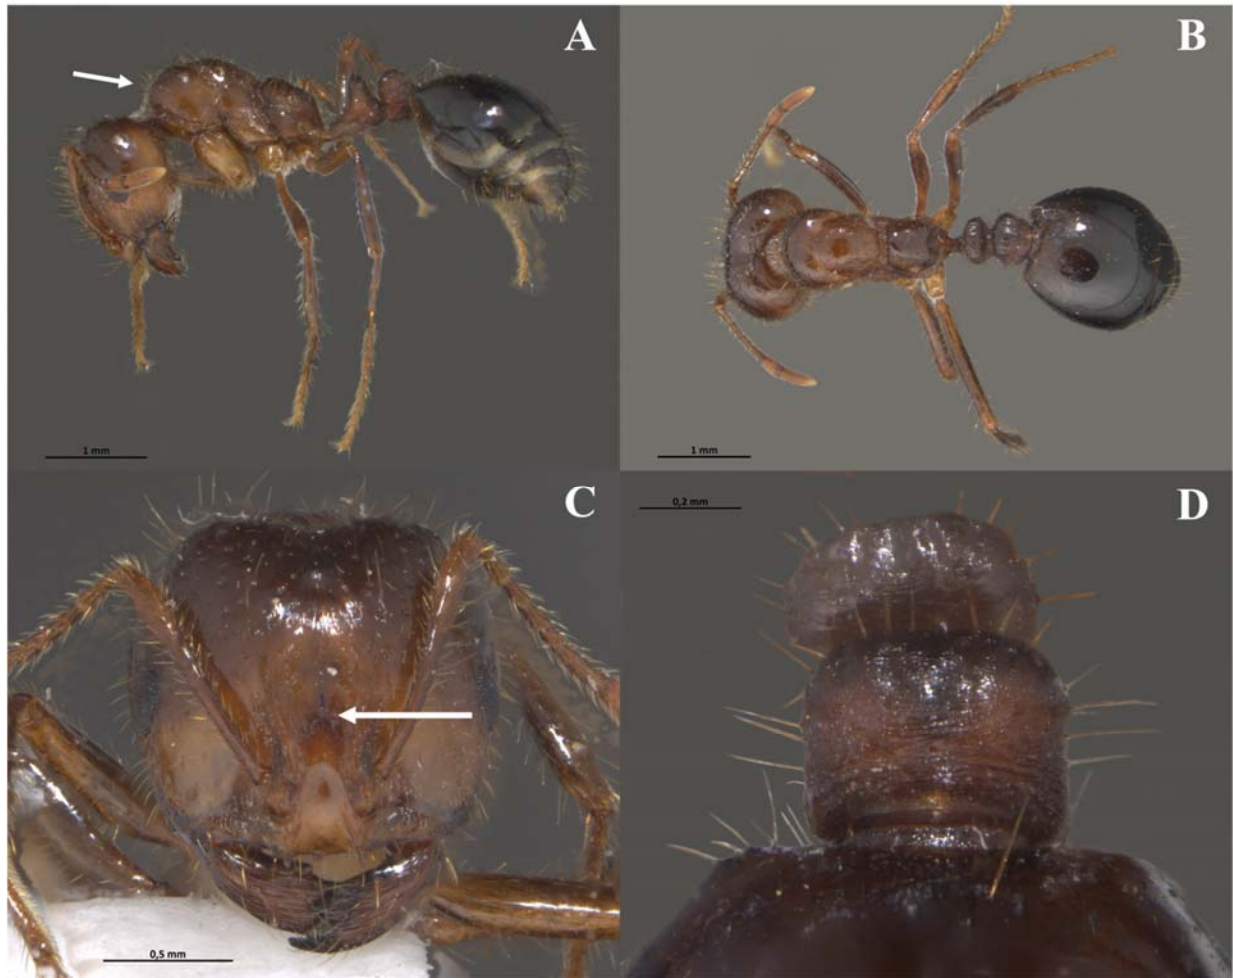

Supplement: s1 [file s1 › Supplementary Material Figure S2.pdf]
