# Supplementary material for: The Facet of Human Impact: Solenopsis invicta Buren, 1972 Spreading around the Atlantic Forest
Source: MDPI journal article supplement (doi:10.3390/d15020194), 2023-02-01
Supplement: s1 [file s1 › Supplementary Material Table S1.pdf]

**Supplementary Material Table S1**

| Nest number | Nest ID | Highway Name | Museum accession number | Geographic coordinates (Latitude & Longitude) |         | GenBank              |                      |                  |
|-------------|---------|--------------|-------------------------|-----------------------------------------------|---------|----------------------|----------------------|------------------|
|             |         |              |                         |                                               |         | Manuscript haplotype | Similar to haplotype | Accession number |
| 1           | Sol351  | BR101        | MPEG.HH<br>Y 0304657    | -23.751                                       | -45.785 | H1                   | <u>MM34</u>          | OP849630         |
| 2           | Sol352  | BR101        | MPEG.HH<br>Y 0304657    | -23.770                                       | -45.708 | H2                   | <u>MM34</u>          | OP849632         |
| 3           | Sol353  | BR101        | MPEG.HH<br>Y 03046578   | -23.783                                       | -45.634 | H3                   | <u>H41</u>           | OP849636         |
| 4           | Sol354  | BR101        | MPEG.HH<br>Y 03046579   | -23.792                                       | -45.553 | H2                   | <u>MM34</u>          | OP849633         |
| 5           | Sol356  | BR101        | MPEG.HH<br>Y 03046580   | -23.825                                       | -45.425 | H2                   | <u>MM34</u>          | OP849634         |
| 6           | Sol380  | BR101        | MPEG.HH<br>Y 03046581   | -23.835                                       | -45.158 | H3                   | <u>H41</u>           | OP849636         |
| 7           | Sol381  | BR101        | MPEG.HH<br>Y 03046582   | -23.890                                       | -45.211 | H4                   | <u>H47/H40</u>       | OP849651         |
| 8           | Sol120  | SP88         | MPEG.HH<br>Y 03046583   | -23.519                                       | -45.539 | H3                   | <u>H41</u>           | OP849636         |
| 9           | Sol121  | SP88         | MPEG.HH<br>Y 03046584   | -23.519                                       | -45.539 | H4                   | <u>H47/H40</u>       | OP849651         |
| 10          | Sol128  | SP88         | MPEG.HH<br>Y 03046585   | -23.528                                       | -45.846 | H3                   | <u>H41</u>           | OP849636         |
| 11          | Sol129  | SP88         | MPEG.HH<br>Y 03046586   | -23.540                                       | -45.932 | H3                   | <u>H41</u>           | OP849636         |
| 12          | Sol133  | SP88         | MPEG.HH<br>Y 03046587   | -23.564                                       | -46.104 | H3                   | <u>H41</u>           | OP849636         |
| 13          | Sol134  | SP88         | MPEG.HH<br>Y 03046588   | -23.523                                       | -46.163 | H3                   | <u>H41</u>           | OP849636         |
| 14          | Sol323  | SP88         | MPEG.HH<br>Y 03046589   | -23.449                                       | -45.247 | H3                   | <u>H41</u>           | OP849636         |
| 15          | Sol326  | SP70         | MPEG.HH<br>Y 03046590   | -23.343                                       | -45.980 | H3                   | <u>H41</u>           | OP849636         |
| 16          | Sol335  | SP99         | MPEG.HH<br>Y 03046591   | -23.251                                       | -45.848 | H4                   | <u>H47/H40</u>       | OP849651         |
| 17          | Sol340  | SP99         | MPEG.HH<br>Y 03046592   | -23.555                                       | -45.523 | H3                   | <u>H41</u>           | OP849636         |
| 18          | Sol342  | SP99         | MPEG.HH<br>Y 03046593   | -23.605                                       | -45.429 | H2                   | <u>MM34</u>          | OP849635         |
