# Supplementary figures and images for: The Facet of Human Impact: Solenopsis invicta Buren, 1972 Spreading around the Atlantic Forest
Source: MDPI journal article supplement (doi:10.3390/d15020194), 2023-02-01

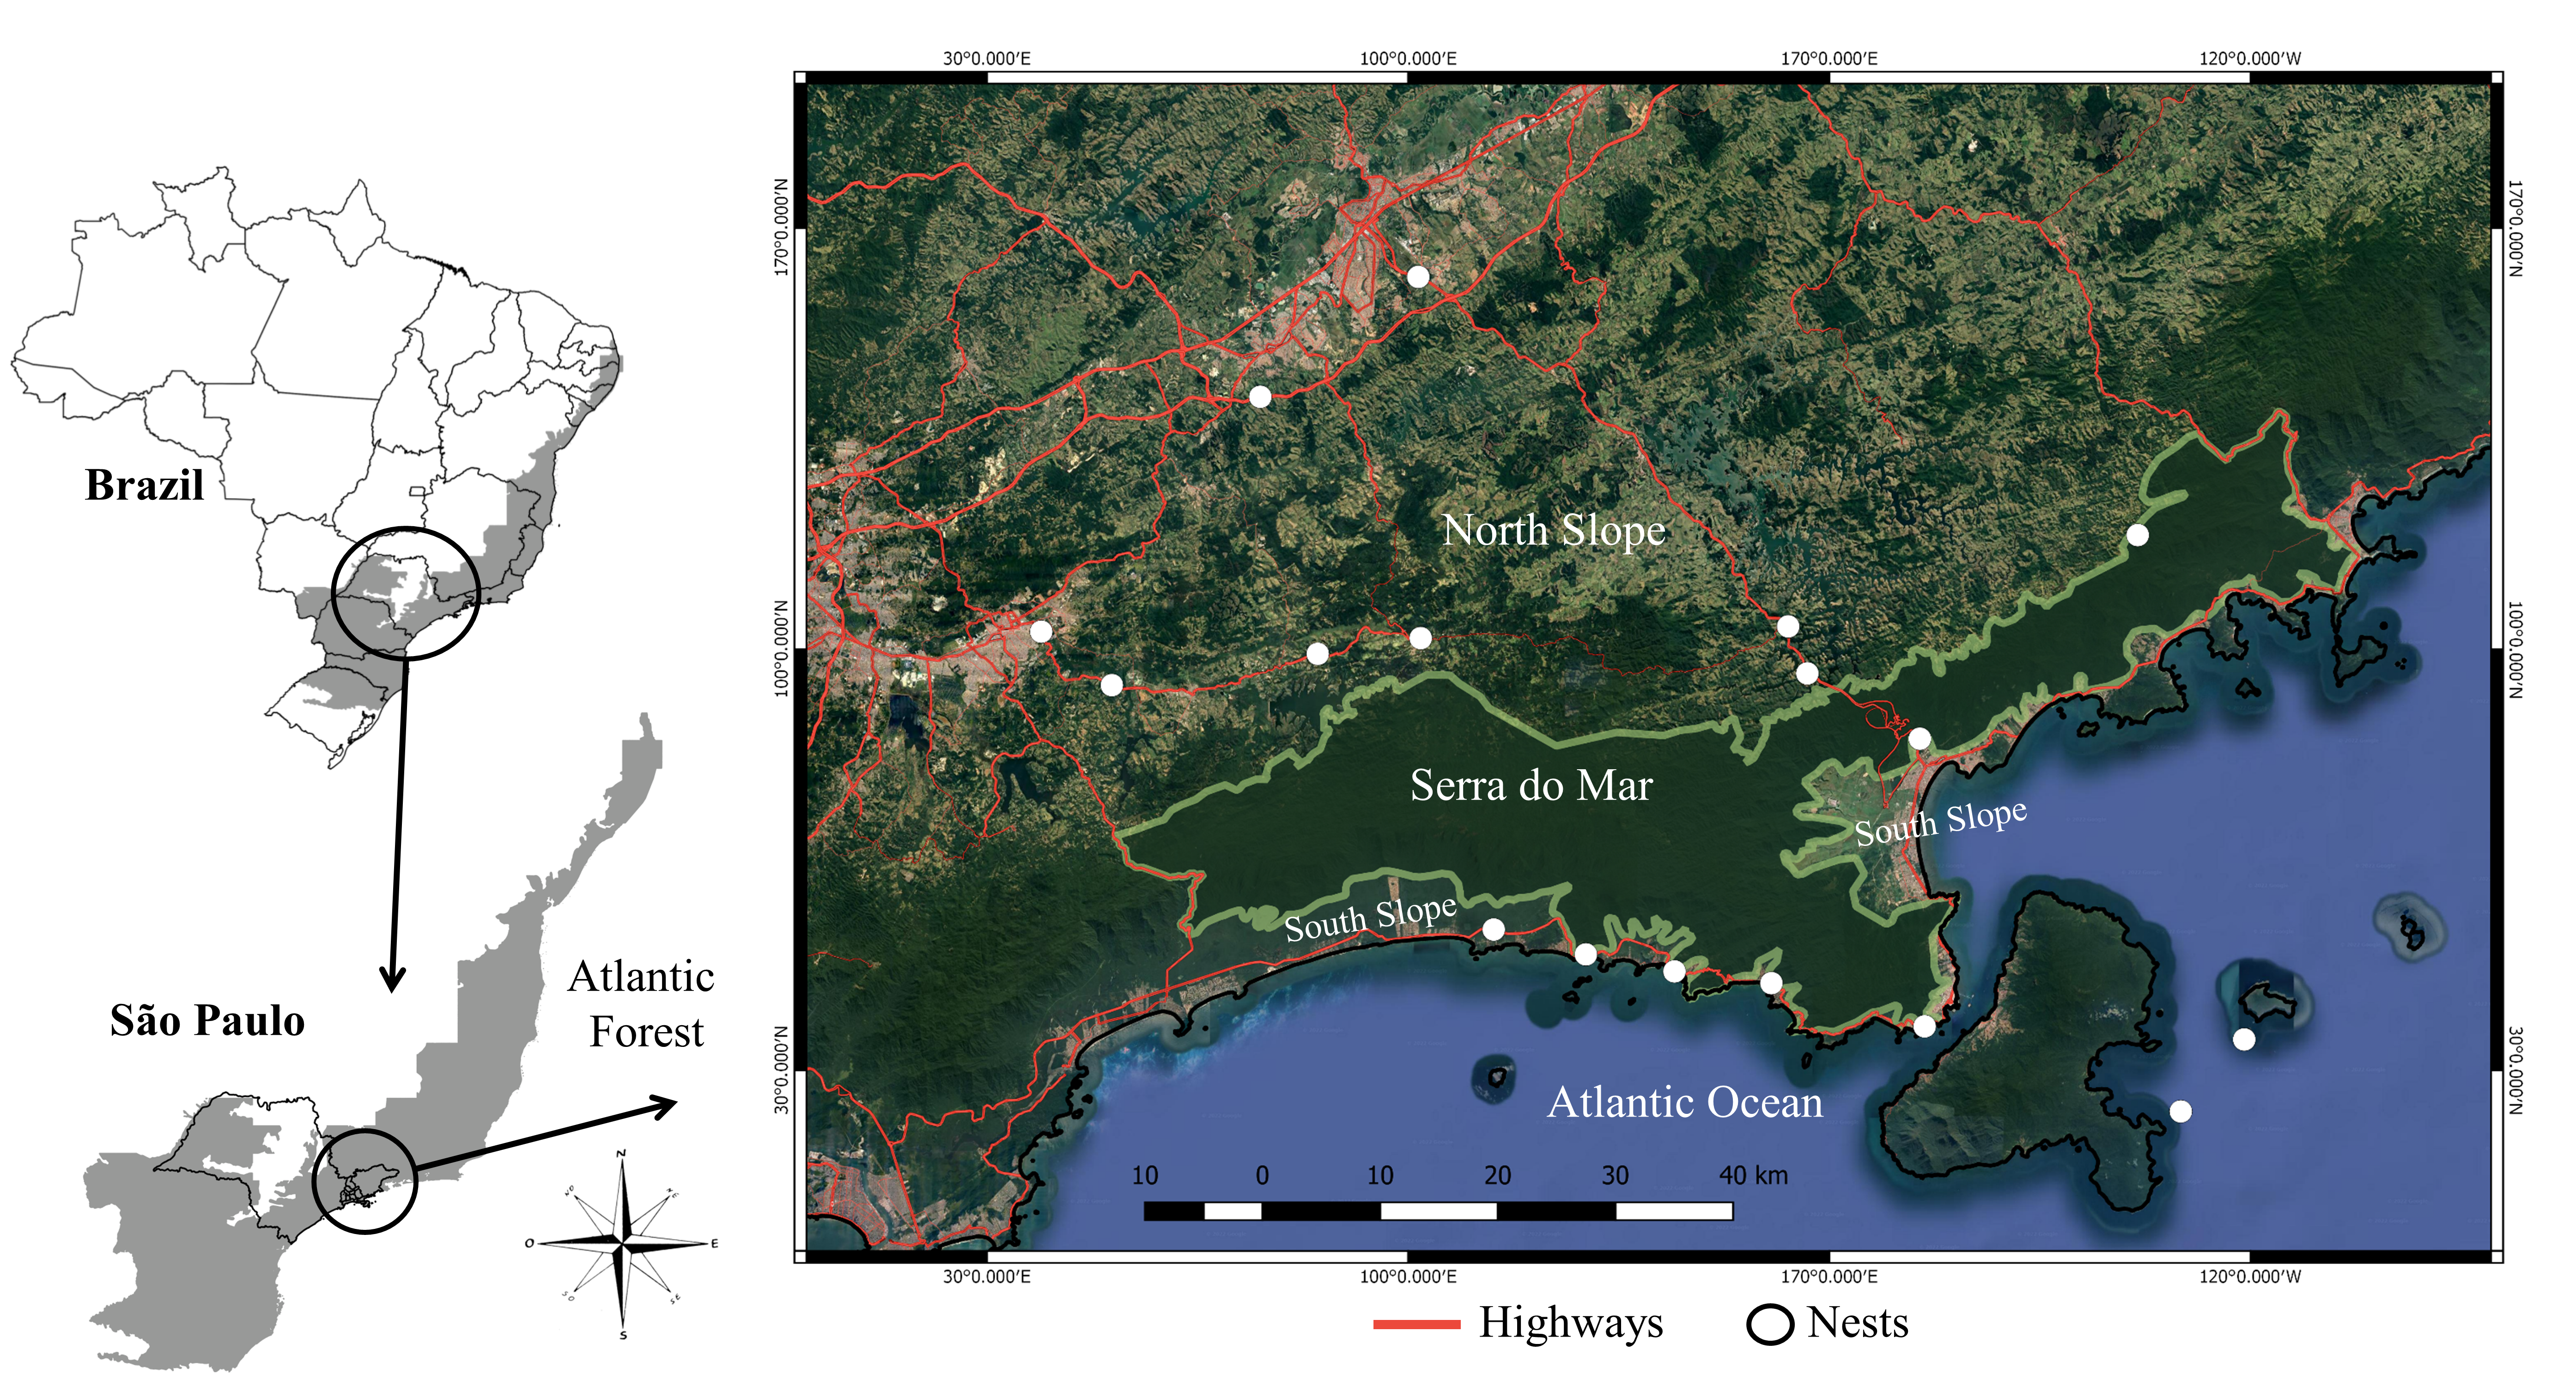

Supplement: s1 [file s1 › Supplementary Material Figure S1.tif]
